# Supplementary material for: Assessment of the Quality of a Health Care Service for People with Ostomies in Northeast Brazil
Source: Research Square preprint supplement (doi:10.21203/rs.3.rs-7755076/v1), 2025-11-25
Supplement: Supplementary file 1 [file 942635fc78eec7a63ac706aa.docx]

**ANNEX A -**Adapted infrastructure and human resources survey questionnaire (MORAES, 2014).

| INFRASTRUCTURE AND HUMAN RESOURCES SURVEY | | | | | | | | | | | |
| --- | --- | --- | --- | --- | --- | --- | --- | --- | --- | --- | --- |
| Infrastructure | | | | | | Human resources | | | | | |
| **1** | **Office equipped with** | | | | | **6** | **Doctor** | | | | |
| 1.1 | Exclusive bathroom with hygienic shower | Try: |  | No: |  | 6.1 | Clinical | Try: |  | No: |  |
| 1.1 1 | Is the toilet adapted for people with ostomies? | Try: |  | No: |  | 6.2 | Proctologist | Try: |  | No: |  |
| 1.2 | Stretcher covered with waterproof material | Try: |  | No: |  | 6.3 | Urologist | Try: |  | No: |  |
| 1.3 | Two-step ladder | Try: |  | No: |  | 6.4 | Gastroenterologist | Try: |  | No: |  |
| 1.4 | Stethoscope | Try: |  | No: |  | 6.5 | General surgeon | Try: |  | No: |  |
| 1.5 | Sphygmomanometer | Try: |  | No: |  | 6.6 | Pediatric surgeon | Try: |  | No: |  |
| 1.6 | Side table with casters | Try: |  | No: |  | 6.7 | Surgical oncologist | Try: |  | No: |  |
| 1.7 | IV stand | Try: |  | No: |  | 6.8 | Head and neck surgeon | Try: |  | No: |  |
| 1.8 | Desk | Try: |  | No: |  | 6.9 | Thoracic Surgeon | Try: |  | No: |  |
| 1.9 | Cabinet | Try: |  | No: |  | **7** | **NURSING** | | | | |
| 1.10 | Chairs | Try: |  | No: |  | 7.1 | Nursing assistant | Try: |  | No: |  |
| 1.11 | Anthropometric scale | Try: |  | No: |  | 7.2 | Nursing technician | Try: |  | No: |  |
| 1.12 | Pediatric scale | Try: |  | No: |  | 7.3 | Nurse | Try: |  | No: |  |
| 1.13 | Trash can with lid and foot pedal control | Try: |  | No: |  | 7.4 | Nurse (with training)  in assistance to people with a chargeback) | Try: |  | No: |  |
| 1.14 | Mirror with minimum dimensions of 120x50cm | Try: |  | No: |  | 7.5 | Stomatherapy Nurse | Try: |  | No: |  |
| 1.15 | Hand hygiene sink | Try: |  | No: |  | 7.6 | Stomatherapist Nurse TiSobest | Try: |  | No: |  |
| 2 | **Meeting room for group service** | Try: |  | No: |  | 8 | **Social Worker** | Try: |  | No: |  |
| 3 | **Women's and men's restrooms with bidet shower and changing table** | Try: |  | No: |  | 9 | **Psychologist** | Try: |  | No: |  |
| 4 | **Place for storing bags** | Try: |  | No: |  | 10 | **Nutritionist** | Try: |  | No: |  |
| 5 | **Room for registration, registration and dispensing of grants, equipped with** | | | | | 11 | **Administrative agent** | Try: |  | No: |  |
| 5.1 | Office table | Try: |  | No: |  |  | | | | | |
| 5.2 | Telephone (and telephone line) | Try: |  | No: |  |
| 5.3 | Computer | Try: |  | No: |  |
| 5.4 | Internet | Try: |  | No: |  |
| 5.5 | Printer | Try: |  | No: |  |
| 5.6 | Chairs | Try: |  | No: |  |
| 5.7 | File | Try: |  | No: |  |
|  | | | | | |
| 5.8 | Cabinet | Try: |  | No: |  |
| 5.9 | Files | Try: |  | No: |  |
| 5.10 | Lightweight | Try: |  | No: |  |
| Note: Mark with an 'X' if Yes or No you have the material or human resource specified in each field. | | | | | | | | | | | |

**ANNEX B -**Questionnaire for the Assessment of Duties and Activities of the Ostomy Care Service (Part I) (MORAES, 2014)

| **Responsibilities** | **Professional who performs** | **Materials used** | **Frequency** | **Detached time** |
| --- | --- | --- | --- | --- |
| **Organization of demand and care for people with stoma within their territory** | □ Nurse  □ Doctor  □ Social Worker  □ Administrative Agent  □ Psychologist  □ Nutritionist  □ Other: _____________ | □ Computer  □ Printer  □  Internet  □  Telephone  □ Files  □ Closet  □  Binders  □ Other:  _____________ | □ Daily  □ 1x/week  □ 2x/semana  □ Biweekly  □ Monthly  □ Other:  ________________ | □ up to 2h. / day  □ 02 to 04h. / day  □ 04 to 06h. / day  □ over 6h. / day  □ Other:  _________________ |
| **Registration and updating of data of patients treated in the service** | □ Nurse  □ Doctor  □ Social Worker  □ Administrative Agent  □ Psychologist  □ Nutritionist  □ Other: _____________ | □ Computer  □ Printer  □  Internet  □  Telephone  □ Files  □ Closet  □  Binders  □ Other:  _____________ | □ Daily  □ 1x/week  □ 2x/semana  □ Biweekly  □ Monthly  □ Other:  ________________ | □ up to 2h. / day  □ 02 to 04h. / day  □ 04 to 06h. / day  □ over 6h. / day  □ Other:  _________________ |
| **Administration of collection equipment and protective and safety adjuvants from acquisition, stock control, storage conditions, evaluation and supply to people with stoma.** | □ Nurse  □ Doctor  □ Social Worker  □ Administrative Agent  □ Psychologist  □ Nutritionist  □ Other: _____________ | □ Computer  □ Printer  □ Internet  □ Telephone  □ Files  □ Closet  □ Binders  □ Other:  _____________ | □ Daily  □ 1x/week  □ 2x/semana  □ Biweekly  □ Monthly  □ Other:  ________________ | □ up to 2h. / day  □ 02 to 04h. / day  □ 04 to 06h. / day  □ over 6h. / day  □ Other:  _________________ |

| **Responsibilities** | **Professional who performs** | **Materials Used** | **Frequency** | **Detached time** |
| --- | --- | --- | --- | --- |
| **Guidance and training of primary care professionals or those in the Service classified as Care for People with Ostomies I** | □ Nurse  □ Doctor  □ Social Worker  □ Administrative Agent  □ Psychologist  □ Nutritionist  □ Other:  _______________ | □ Computer  □ Printer  □ Internet  □ Telephone  □ Files  □ Closet  □ Binders  □ Other:  ______________ | □ Daily  □ 1x/week  □ 2x/semana  □ Biweekly  □ Monthly  □ Other:  _______________ | □ up to 2h. / day  □ 02 to 04h. / day  □ 04 to 06h. / day  □ over 6h. / day  □ Other:  _______________ |
| **Training of hospital units and health teams regarding assistance in the pre- and post-operative stages of surgeries that lead to the creation of ostomies, including reconstructions of intestinal and urinary tracts** | □ Nurse  □ Doctor  □ Social Worker  □ Administrative Agent  □ Psychologist  □ Nutritionist  □ Other:  _______________ | □ Computer  □ Printer  □ Internet  □ Telephone  □ Files  □ Closet  □ Binders  □ Other:  ______________ | □ Daily  □ 1x/week  □ 2x/semana  □ Biweekly  □ Monthly  □ Other:  _______________ | □ up to 2h. / day  □ 02 to 04h. / day  □ 04 to 06h. / day  □ over 6h. / day  □ Other:  _______________ |
| **Scheduling with the patient the frequency for delivery of collection equipment and protective and safety adjuvants;** | □ Nurse  □ Doctor  □ Social Worker  □ Administrative Agent  □ Psychologist  □ Nutritionist  □ Other:  _______________ | □ Computer  □ Printer  □ Internet  □ Telephone  □ Files  □ Closet  □ Binders  □ Other:  ______________ | □ Daily  □ 1x/week  □ 2x/semana  □ Biweekly  □ Monthly  □ Other:  _______________ | □ up to 2h. / day  □ 02 to 04h. / day  □ 04 to 06h. / day  □ over 6h. / day  □ Other:  _______________ |
| **Carrying out                                   referrals when any complications are detected** | □ Nurse  □ Doctor  □ Social Worker  □ Administrative Agent  □ Psychologist  □ Nutritionist  □ Other:  _______________ | □ Computer  □ Printer  □ Internet  □ Telephone  □ Files  □ Closet  □ Binders  □ Other:  ______________ | □ Daily  □ 1x/week  □ 2x/semana  □ Biweekly  □ Monthly  □ Other:  _______________ | □ up to 2h. / day  □ 02 to 04h. / day  □ 04 to 06h. / day  □ over 6h. / day  □ Other:  _______________ |

**ANNEX C -**Questionnaire for the Assessment of Duties and Activities of the Ostomy Care Service (Part II) (MORAES, 2014)

| **ACTIVITIES** | **Professional who performs** | **Materials** | | **Type** | **Frequency** | **Detached time** |
| --- | --- | --- | --- | --- | --- | --- |
| **Individual assistance** | □ Nurse  □  Doctor  □ Social Worker  □ Administrative Agent  □ Psychologist  □ Nutritionist  □ Other: ____________ | □ Maca  □ 2-step ladder  □ Sphygmomanometer  □ Stethoscope  □ Side table  □ Anthropometric scale  □ Pediatric scale  □ Others:  _________________ | | **x** | □ Daily  □ 1x/week  □ 2x/semana  □  Biweekly  □ Monthly  □ Other:  _______________ | □ up to 2h. / day  □ 02 to 04h. / day  □ 04 to 06h. / day  □ over 6h. / day  □ Other:  _________________ |
| **Group service** | □ Nurse  □  Doctor  □ Social Worker  □ Administrative Agent  □ Psychologist  □ Nutritionist  □ Other: ____________ | **x** | | □ Group guidance  □ Operational group  □ Educational activities in health and daily life  □ Other:  ______________ | □ Daily  □ 1x/week  □ 2x/semana  □  Biweekly  □ Monthly  □ Other:  _______________ | □ up to 2h. / day  □ 02 to 04h. / day  □ 04 to 06h. / day  □ over 6h. / day  □ Other:  _________________ |
| **Family services** | □ Nurse  □  Doctor  □ Social Worker  □ Administrative Agent  □ Psychologist  □ Nutritionist  □ Other: ____________ | **x** | | □ Individual assistance  □ Group guidance  □ Operational group  □ Educational activities in health and daily life  □ Other:  ______________ | □ Daily  □ 1x/week  □ 2x/semana  □  Biweekly  □ Monthly  □ Other:  _______________ | □ up to 2h. / day  □ 02 to 04h. / day  □ 04 to 06h. / day  □ over 6h. / day  □ Other:  _________________ |
| **Main activity carried out in the Unit** | | | □ User registration  □  Dispensing of bags and devices  □ Individual consultations  □ User orientation activities (individual or group)  □ Training activities for health professionals  □ Other: | | | |
| **Frequency of nursing consultation for the user in the unit** | | | □ Only when the user registers for the service  □ When the user registers for the service and every 4 months  □ At the time of user registration for the service and when complications arise in the stoma  □ Only when complications arise in the stoma  □  Nursing consultations are not carried out in the unit  □ Other: | | | |
| **Frequency of medical consultation for the user in the unit** | | | □ Only when the user registers for the service  □ When the user registers for the service and every 4 months  □ At the time of user registration for the service and when complications arise in the stoma  □ Only when complications arise in the stoma  □  Medical consultations are not carried out at the unit.  □ Other: | | | |
| **Frequency of consultation with the social worker for the user** | | | □ Only when the user registers for the service  □ When the user registers for the service and every 4 months  □ At the time of user registration for the service and when complications arise in the stoma  □ Only when complications arise in the stoma  □  Medical consultations are not carried out at the unit.  □ Other: | | | |

**ANNEX D -**Questionnaire for the Assessment of Duties and Activities of the Ostomy Care Service (Part III) (MORAES, 2014)

| **Main bags and devices dispensed in the unit** | □ Colostomy bag, 1-piece closed, opaque system  □ Colostomy bag, 1-piece, open, transparent system  □ Colostomy pouch, 1-piece open, opaque system  □ Transparent open 2-piece system colostomy bag  □ Colostomy bag, 2-piece system, open, opaque  □ Colostomy bag system 1 piece - convex plate  □ Colostomy bag 2-piece system - convex plate  □ Infant colostomy bag  □ Neonatal colostomy bag  □ Urostomy bag  □ Skin protector (paste)  □ Skin protector (powder)  □ Occlusion system  □ Irrigation system for colostomies  □ Others: _________________________________ |
| --- | --- |
| **Frequency of dispensing bags and devices to users** | □ Weekly  □ Biweekly  □ Monthly  □ Bimonthly  □ Other: __________________________________ |
| **Frequency of planning and requesting grants and devices for the Health Department** | □ Weekly  □ Biweekly  □ Monthly  □ Bimonthly  □ Other: __________________________________ |
| **Aspects assessed as being important for requesting a bag or devices used for ostomy care** | □ Product brand  □ Adhesiveness  □ Comfort  □ Trust  □ Cost  □ Other: __________________________________ |
| **Who recommends the pouch or devices for ostomy care?** | □ Doctor  □ Nurse  □ Nursing technician  □ Service user  □ Other: __________________________________ |
| **Main complications treated in the unit** | □ Dermatitis  □ Hernias  □ Prolapse  □ Retraction  □ Mucocutaneous detachment  □ Ischemia and necrosis  □ Other: __________________________________ |

**ANNEX E -**Questionnaire for interviewing people with stoma (adapted SANTOS, 2020)

| **SOCIODEMOGRAPHIC DATA** |
| --- |
| Name initials: |
| Age: years |
| Sex: 1. ( ) female 2. ( ) male |
| Race/Color: 1.( ) white 2.( ) brown 3.( ) black 4.( ) yellow 5.( ) indigenous |
| Profession:  1.( ) Active 2. ( ) Retired/beneficiary 3.( ) Unemployed 4. ( ) Other: |
| Marital Status: 1. ( ) With partner 2. ( ) Without partner 3. ( ) Other: |
| Number of children: |
| Monthly Income: ( ) 1 SM ( ) 2 - 3 SM ( ) + 3 SM |
| Education: 1. ( ) illiterate 2. ( ) literate 3. ( ) incomplete elementary education 4. ( ) elementary education 5. ( ) incomplete high school 6. ( ) high school 7. ( ) incomplete higher education 8. ( ) higher education |
| Religion: 1.( ) Catholic 2.( ) Evangelical 3.( ) Spiritist 4.( ) Atheist 5.( ) Others: 6.( ) It doesn't have |
| **SATISFACTION ABOUT THE SERVICE RECEIVED** |
| During your hospital stay, did you receive any guidance before surgery about creating the stoma? ( ) Yes ( ) No |
| During your hospital stay, did you receive any guidance before surgery about the care that should be taken? ( ) Yes ( ) No |
| During your hospital stay, did you receive any guidance after surgery on how to change the pouch correctly?  ( ) Try ( ) No |
| During your hospitalization, did you receive any guidance after surgery about ostomy care?  ( ) Try ( ) No |
| Do you receive guidance at the ostomy referral unit?  ( ) Try ( ) No |
| Do the guidelines provided at the ostomy referral unit meet your needs in terms of ostomy care and daily life?  ( ) Totally ( ) Partially ( ) No |
| Are your questions and problems resolved during the service?  ( ) Totally ( ) Partially ( ) No |
| What is your greatest strength in relation to the service offered?  ( ) Service ( ) Access ( ) Other ( ) Did not describe ease |
| What is your main difficulty regarding the service offered?  ( ) Waiting time for medical care ( ) Difficulties related to transportation, location and parking ( ) Other ( ) No difficulty described |
| Do you receive guidance on activities focusing on the inclusion of people with stoma in the family and society?  ( ) Try ( ) No |
| Do you receive guidance and encouragement to participate in support groups?  ( ) Try ( ) No |
| **SATISFACTION ABOUT THE EQUIPMENT RECEIVED** |
| Is the amount of equipment received through the service sufficient for monthly use?  ( ) Try ( ) No |
| Have you ever not received the collection equipment for monthly use?  ( ) Try ( ) No |
| Does the collection equipment received by the unit meet its needs?  ( ) Totally ( ) Partially ( ) No |
| How satisfied are you with the quality of the collection equipment?  ( ) Completely satisfied ( ) Partially satisfied ( ) Dissatisfied |
| Do you feel safe using the equipment daily?  ( ) Completely secure ( ) Partially secure ( ) Unsafe |

**ANNEX F -**Medical record form for people with stoma (adapted from MORAES, 2014; SANTOS, 2020)

| **CLINICAL DATA AND DISPENSATION OF MATERIALS** |
| --- |
| Ostomy time: |
| Cause  ( ) Neoplasia ( ) Trauma ( ) Inflammatory bowel disease ( ) Diverticular disease ( ) Others: |
| Surgical procedure  ( ) Rectosigmoidectomy ( ) Rectal amputation ( ) Urinary system surgery ( ) Other: |
| Type of ostomy  ( ) Colostomy ( ) Ileostomy ( ) Urostomy ( ) Other: |
| Permanence  ( ) Temporary ( ) Permanent |
| Main complications  ( ) Dermatitis ( ) Hernia ( ) Prolapse ( ) Retraction ( ) Mucocutaneous detachment ( ) Ischemia and necrosis ( ) Other: |
| Quantity of collection equipment received monthly by the unit?  ( ) 5 ( ) 10 ( ) 15 ( ) 20 ( ) 30 ( ) 60 |
| Do you receive any adjuvant material?  ( ) Powder ( ) Paste ( ) Skin protective film ( ) Combination of adjuvants ( ) Not used |
| Bag and devices used  ( ) Colostomy bag 1 piece ( ) Colostomy bag 2 pieces ( ) Urostomy bag  ( ) Closed ( ) Open  ( ) Opaque ( ) Transparent  ( ) Plan ( ) Convex  ( ) Infant colostomy bag ( ) Neonatal colostomy bag  ( ) Urinary collector leg or bed  ( ) Occlusion system ( ) Irrigation system ( ) Other |
| Frequency of dispensing bags and devices to users  ( ) Weekly ( ) Fortnightly ( ) Monthly ( ) Bimonthly ( ) Other: |
| Who recommends the pouch or device for ostomy care?  ( ) Doctor ( ) Nurse ( ) Nursing technician ( ) User ( ) Other: |
